# Supplementary material for: Arabinogalactan proteins are involved in root hair development in barley
Source: PubMed Central journal article supplement (PMC4339589; doi:10.1093/jxb/eru475), 2014-12-01
Supplement: supp_eru475_jexbot137489_file001.pdf [file supp_eru475_jexbot137489_file001.pdf]

## Arabinogalactan proteins are involved in root hair development in barley

Marek Marzec, Iwona Szarejko, and Michael Melzer

### SUPPLEMENTARY DATA

**Supplementary Table S1. The effect of  $\beta$ GlcY treatment on root hair tube elongation in barley cvs ‘Dema’, ‘Diva’ and ‘Optic’.**

|                                                       | ‘Dema’                                               | ‘Diva’                                               | ‘Optic’                                              |
|-------------------------------------------------------|------------------------------------------------------|------------------------------------------------------|------------------------------------------------------|
| <b>H<sub>2</sub>O</b>                                 | 409.1 $\mu$ m ( $\pm$ 41.6)                          | 386.1 $\mu$ m ( $\pm$ 39.4)                          | 356.7 $\mu$ m ( $\pm$ 38.2)                          |
| <b><math>\alpha</math>GlcY (25 <math>\mu</math>M)</b> | 389.8 $\mu$ m ( $\pm$ 48.1)                          | 396.4 $\mu$ m ( $\pm$ 45.1)                          | 379.3 $\mu$ m ( $\pm$ 45.7)                          |
| <b><math>\beta</math>GluY (1 <math>\mu</math>M)</b>   | 378.6 $\mu$ m ( $\pm$ 50.5)                          | 376.5 $\mu$ m ( $\pm$ 40.9)                          | 374.1 $\mu$ m ( $\pm$ 48.6)                          |
| <b><math>\beta</math>GluY (10 <math>\mu</math>M)</b>  | <u>29.1 <math>\mu</math>m (<math>\pm</math>12.8)</u> | <u>42.8 <math>\mu</math>m (<math>\pm</math>16.6)</u> | <u>27.1 <math>\mu</math>m (<math>\pm</math>13.9)</u> |
| <b><math>\beta</math>GluY (25 <math>\mu</math>M)</b>  | -                                                    | -                                                    | -                                                    |

Mean root hair lengths were based on at least 1,000 root hairs measured from 15 roots in 3 biological repeats. Underlined mean values in table indicate the statistical significance, in comparison to control conditions (Student's *t* test ( $P < 0.05$ )).

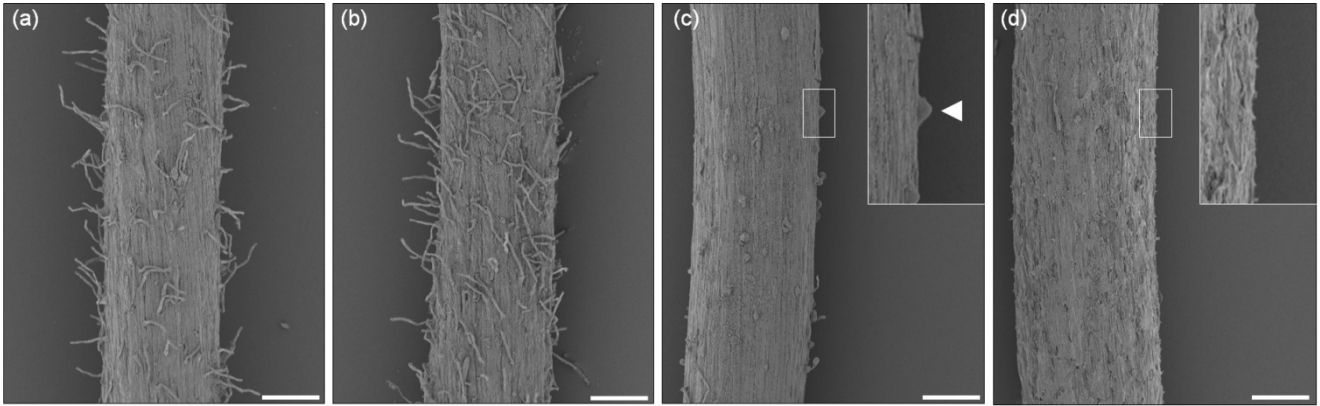

**Supplementary Figure S1.** SEM analysis of BGlcY-induced inhibition of root hair elongation in cv. 'Dema' plant exposed to (a) 25  $\mu\text{M}$   $\alpha\text{GalY}$ , (b) 1  $\mu\text{M}$   $\beta\text{GlcY}$ , (c) 10  $\mu\text{M}$   $\beta\text{GlcY}$ , and (d) 25  $\mu\text{M}$   $\beta\text{GlcY}$ . Arrowhead indicates primordium. Scale bar 200  $\mu\text{m}$ .

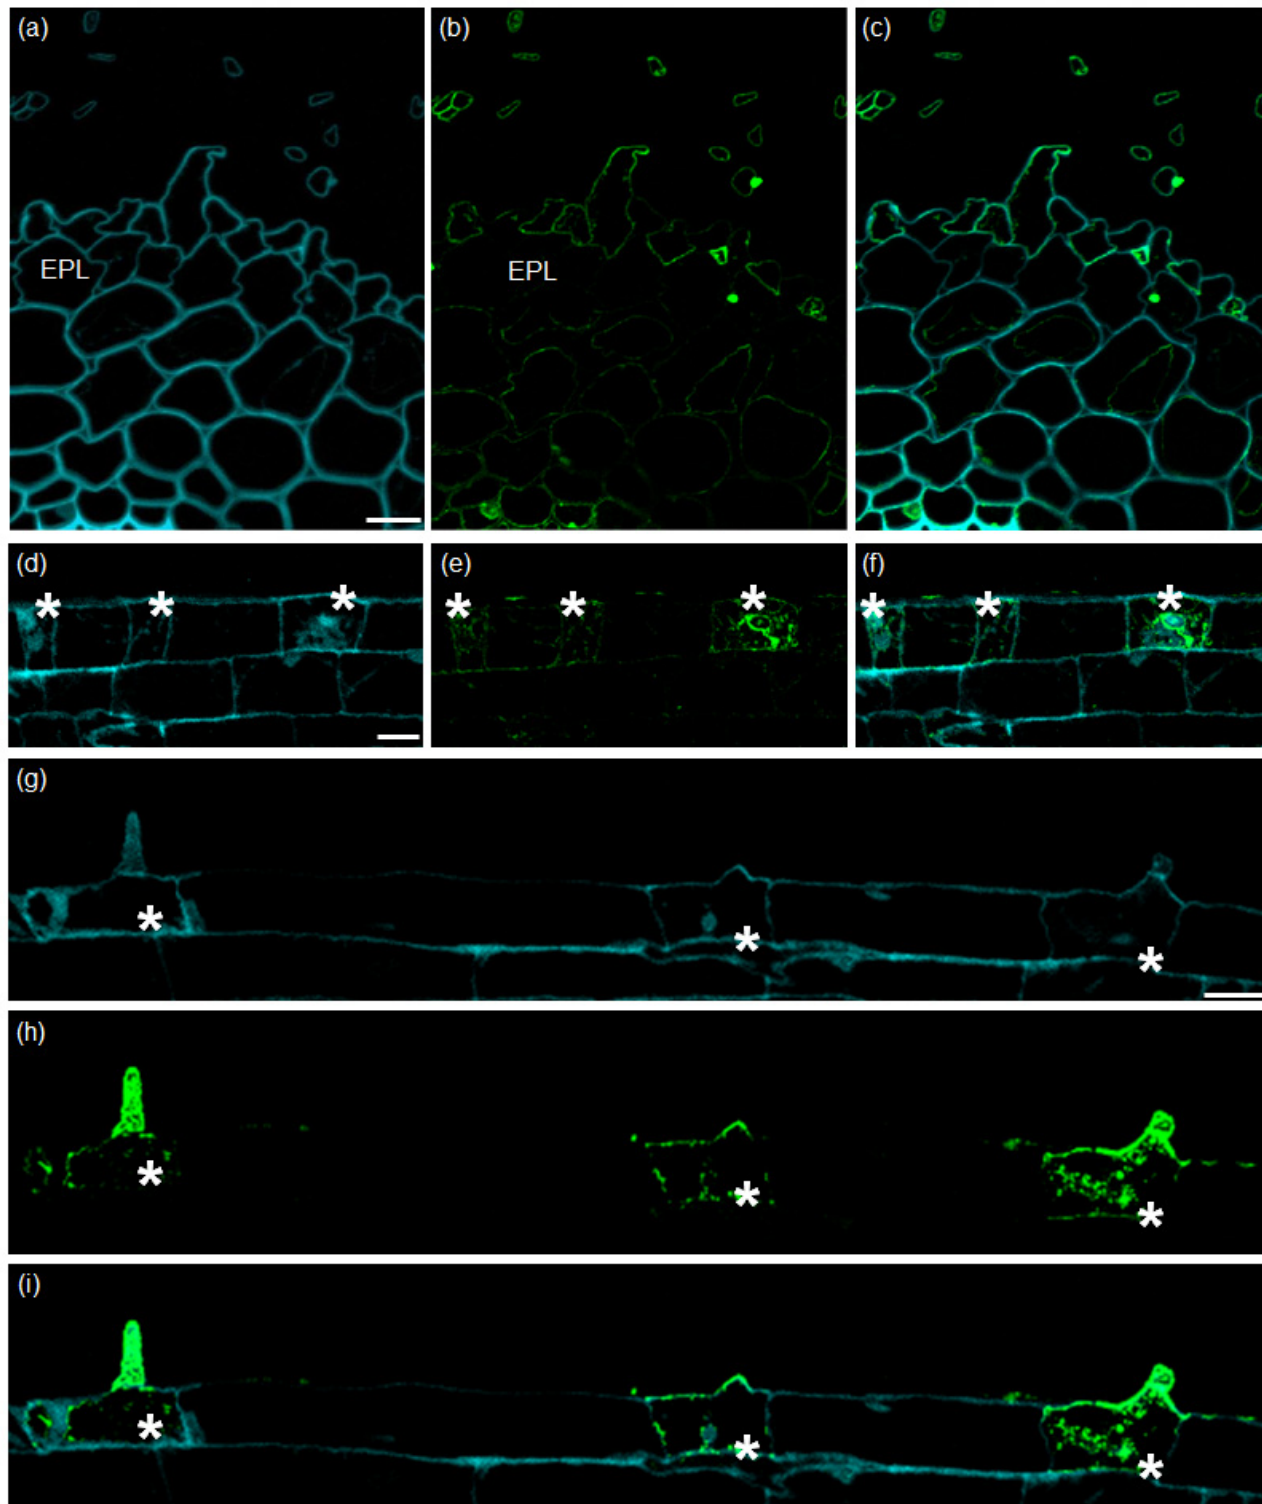

**Supplementary Figure S2.** CLSM analysis of LM2 epitope deposition (marked in green) in the cv. 'Karat' root. (a-c) Transverse section of the mature root hair zone, (d-f) longitudinal section of the differentiation zone, and (h,i) nascent root hairs. Asterisks indicate trichoblasts. EPL: external parenchyma layer. Scale bar 20  $\mu\text{m}$

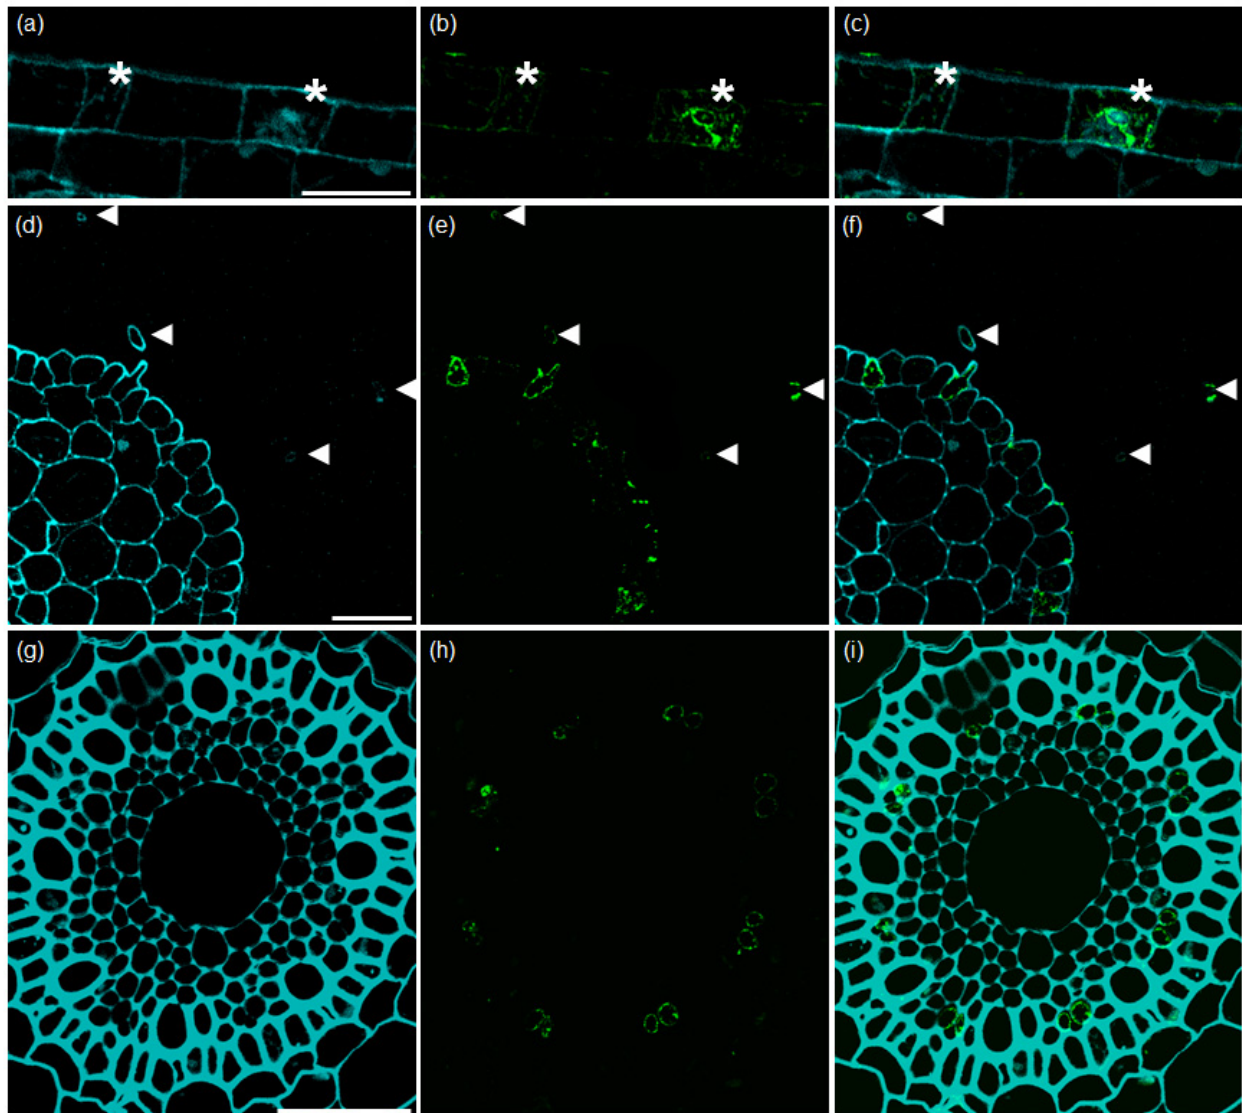

**Supplementary Figure S3.** Localization of MAC207 epitopes in cv. ‘Karat’ roots, as visualized by CLSM. (a-c) A longitudinal section of the differentiation zone revealed a concentration of epitopes in the trichoblasts, while (d-f) a transverse section showed their presence in root hair cells and tubes, and (g-i) in phloem sieve elements. Asterisks indicate trichoblasts, and arrowheads root hair tubes. Scale bar 50 $\mu$ m.

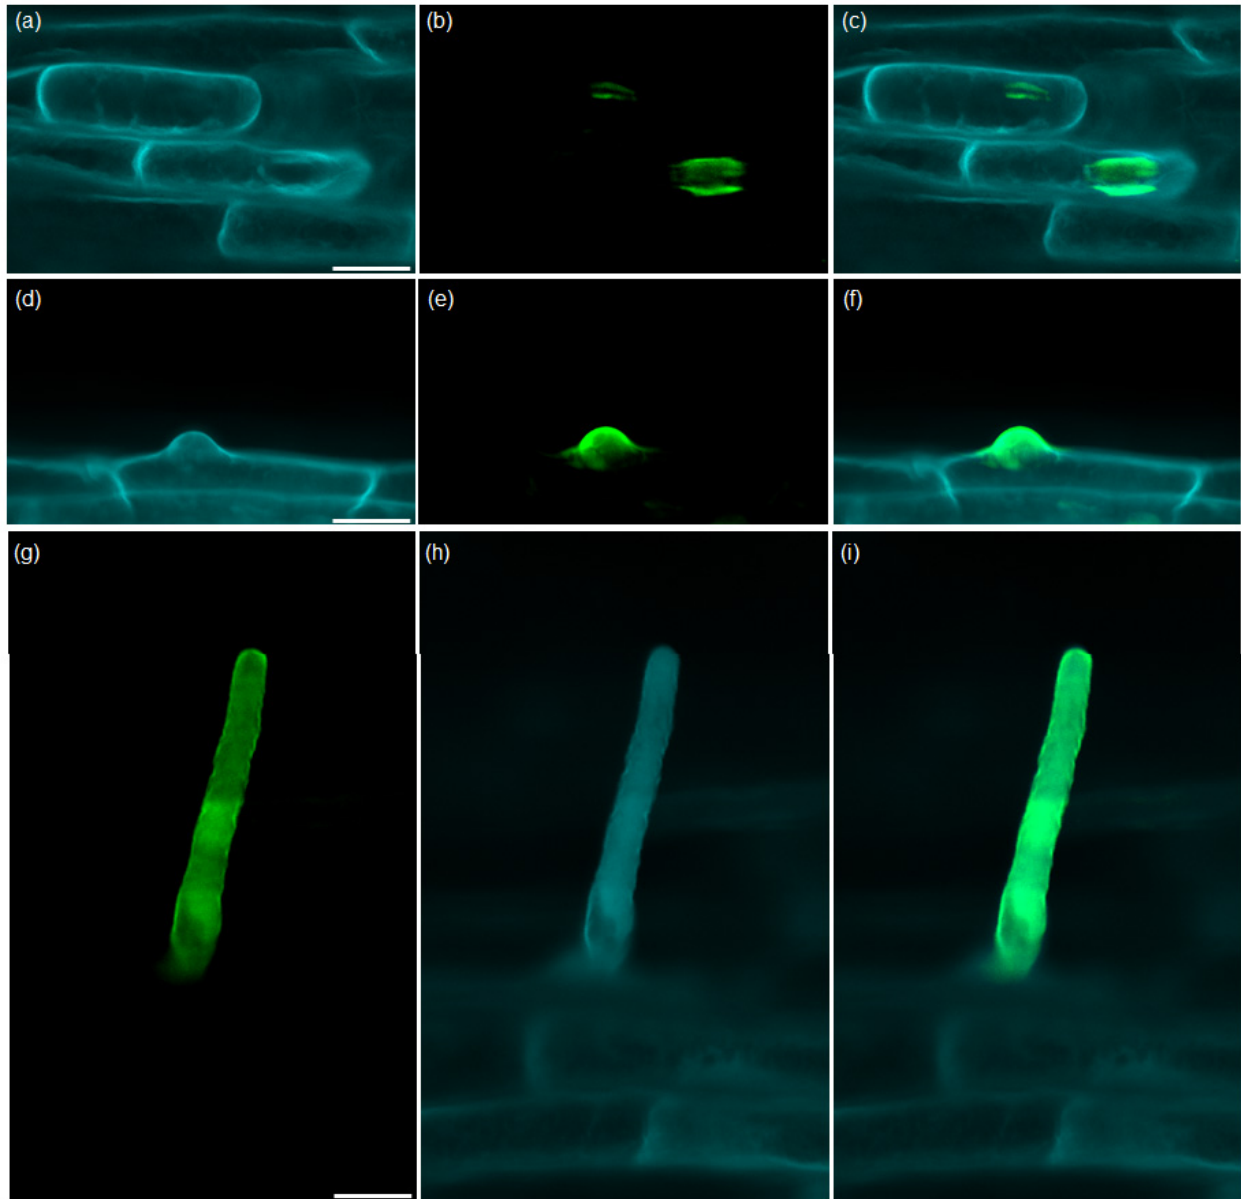

**Supplementary Figure S4.** LM2 epitopes on the cv. 'Dema' root surface as visualized by CLSM. Epitopes present (a-c) in the root hair extracellular matrix at an early stage of root hair differentiation, (d-f) in the developed primordium, and (g-i) in the root hair tubes. Scale bar 20  $\mu\text{m}$ .
